# Supplementary material
Source: PubMed Central journal article supplement (PMC3117638)
Supplement: emboj2011104s1.pdf [file emboj2011104s1.pdf]

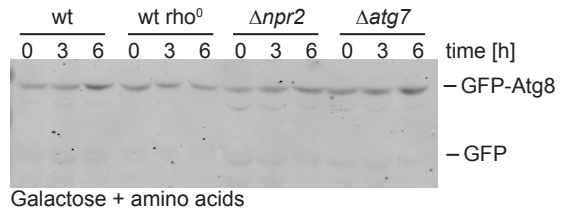

**Figure S1**

**ATG14 induction**

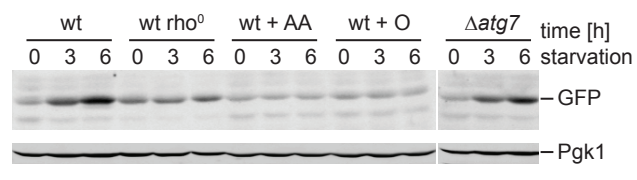

**Figure S2**

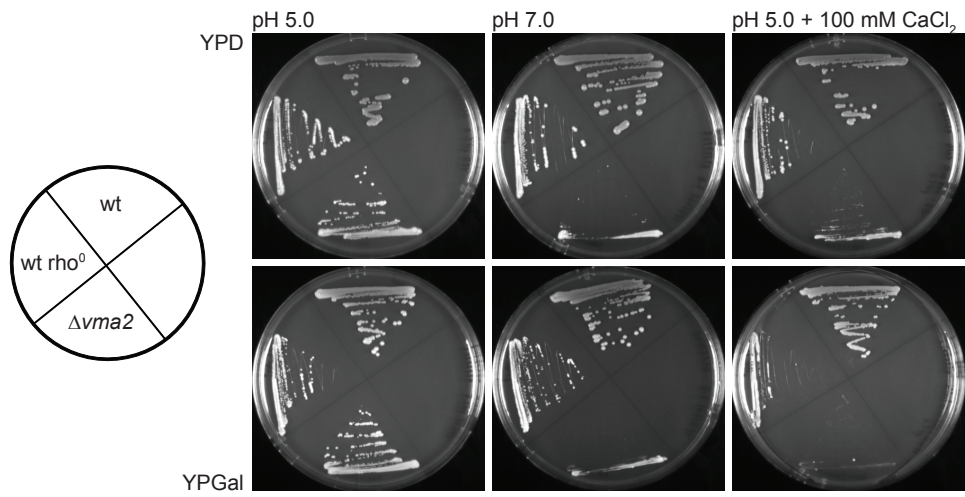

Figure S3

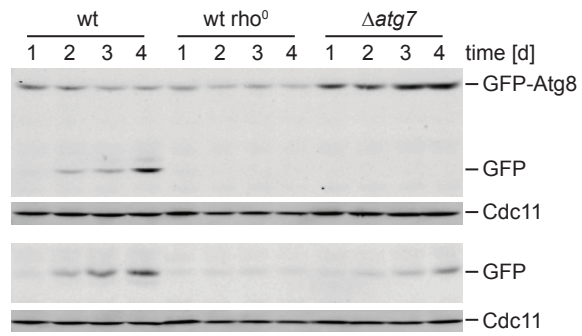

Figure S4

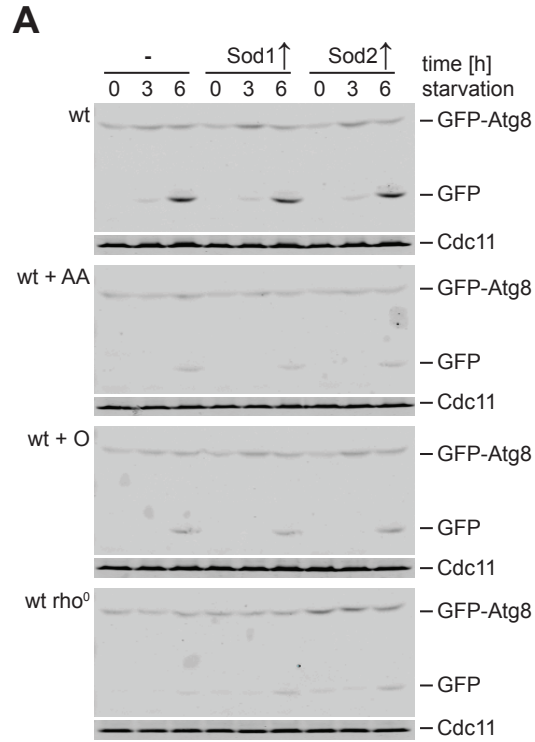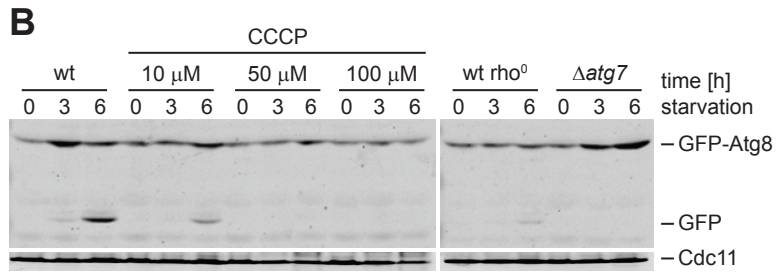

**Figure S5**

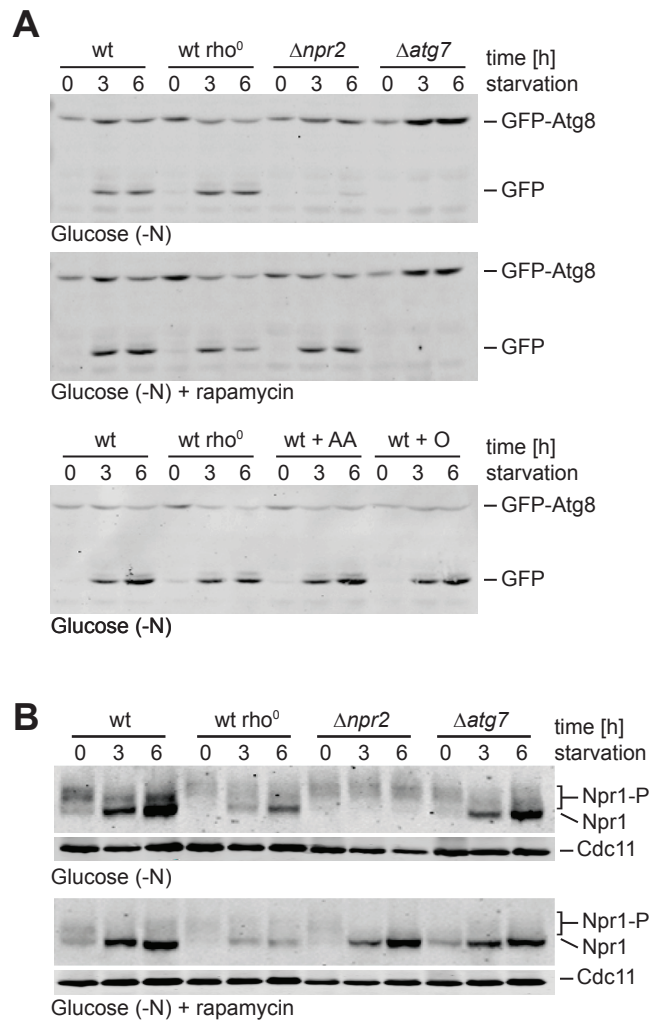

Figure S6

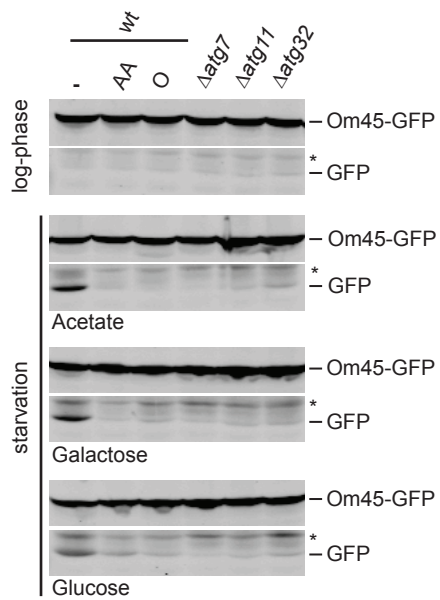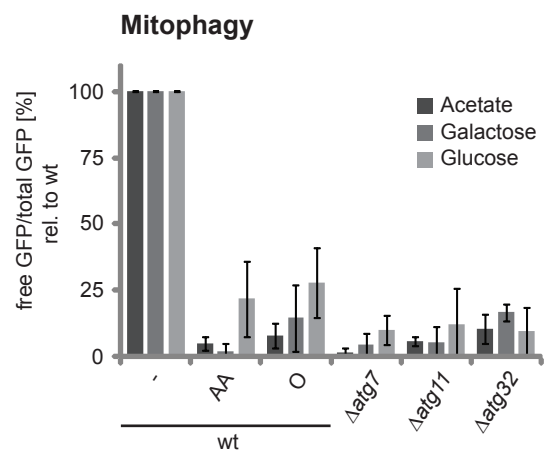

Figure S7

## Supplementary information

**Fig. S1:** Wild type,  $\rho^0$ ,  $\Delta npr2$ , and  $\Delta atg7$  cells harboring  $pr^{ATG8}$ -GFP-ATG8 were exposed to amino acid starvation medium supplemented with amino acids and galactose. Samples were analyzed by whole cell extraction and western blot analysis using a  $\alpha$ -GFP antibody.

**Fig. S2: ATG14 induction during amino acid starvation.** Wild type,  $\rho^0$ , and  $\Delta atg7$  cells harboring  $pr^{ATG14}$ -GFP were exposed to amino acid starvation medium supplemented with acetate in the presence or absence of antimycin A (AA) or oligomycin (O). Cells were analyzed at indicated time points by whole cell extraction and western blot analysis using  $\alpha$ -GFP and  $\alpha$ -Pgk1 antibodies.

**Fig. S3:  $\rho^0$  cells display growth behavior consistent with intact vacuolar acidification.** Wild type,  $\rho^0$ , and  $\Delta vma2$  cells were grown on solid YP medium in the presence of glucose (YPD) or galactose (YPGal) at indicated pH and  $\text{CaCl}_2$  concentration for 3-5 days at 30°C. Note that, in contrast to wild type and  $\rho^0$  cells, the growth of cells lacking subunit B of the vacuolar  $\text{H}^+$ -ATPase ( $\Delta vma2$ ) is strongly impaired at pH 7.0 and in the presence of 100 mM  $\text{CaCl}_2$  consistent with defects in vacuolar acidification described previously (Graham et al., 2000).

**Fig. S4: Autophagic response during prolonged stationary phase.** Log-phase wild type,  $\rho^0$ , and  $\Delta atg7$  cells harboring  $pr^{ATG8}$ -GFP-ATG8 (upper panels) or  $pr^{ATG8}$ -GFP (lower panels) were grown to stationary phase in galactose medium. Cells were analyzed at indicated time points by whole cell extraction and western blot analysis using  $\alpha$ -GFP and  $\alpha$ -Cdc11 antibodies.

**Fig. S5: (A)** Overexpression of cytosolic or mitochondrial superoxide dismutase does not affect the autophagic response in the presence of mitochondrial respiratory deficiency. Wild type and  $\rho^0$  cells harboring  $pr^{ATG8}$ -GFP-ATG8 were exposed to amino acid starvation medium supplemented with galactose in the presence of antimycin A (AA) or oligomycin (O) when indicated. Wild type and  $\rho^0$  cells overexpressed cytosolic (Sod1) or mitochondrial (Sod2) superoxide dismutase when indicated. Samples were analyzed at indicated time points by whole cell extraction and western blot analysis using  $\alpha$ -GFP and  $\alpha$ -Cdc11 antibodies. **(B)** Effect of lowered membrane potential on the autophagic response during amino acid starvation. Wild type,  $\rho^0$ , and  $\Delta atg7$  cells harboring  $pr^{ATG8}$ -



*GFP-ATG8* were exposed to amino acid starvation medium supplemented with galactose. Wild type cells were exposed to CCCP at indicated concentrations during starvation. Samples were analyzed as described in (A).

**Fig. S6: Autophagic response of respiratory deficient cells during nitrogen starvation.** (A) Wild type,  $\rho^0$ ,  $\Delta npr2$ , and  $\Delta atg7$  cells were exposed to nitrogen starvation medium supplemented with glucose in the absence (upper panel) or presence (middle panel) of rapamycin (400 ng/ml). Wild type cells were exposed to antimycin (AA) or oligomycin (O) during nitrogen starvation as indicated (lower panel). Samples were analyzed by whole cell extraction and western blot analysis using a  $\alpha$ -GFP antibody. (B) Wild type,  $\rho^0$ ,  $\Delta npr2$ , and  $\Delta atg7$  cells expressing  $pr^{NPR1}$ -NPR1-HA were exposed to nitrogen starvation medium supplemented with glucose in the absence (upper panels) or presence (lower panels) of rapamycin (400 ng/ml). The hyperphosphorylated (Npr1-P) and dephosphorylated (Npr1) forms of Npr1 are indicated. Cells were analyzed at indicated time points by whole cell extraction and western blot analysis using  $\alpha$ -HA and  $\alpha$ -Cdc11 antibodies.

**Fig. S7: Mitochondrial respiratory deficiency impairs mitophagy under amino acid starvation.** Wild type,  $\Delta atg7$ ,  $\Delta atg11$ , and  $\Delta atg32$  cells expressing the outer mitochondrial membrane protein and established mitophagy reporter  $pr^{OM45}$ -OM45-GFP (Kanki and Klionsky, 2008) were grown in YPlactate medium (log-phase) and exposed to amino acid starvation medium (starvation) supplemented with indicated carbon sources for 24 h. To impair mitochondrial function, wild type cells were exposed to antimycin A (AA) or oligomycin (O) during starvation. Om45-GFP (upper panels) and free GFP levels (lower panels) were monitored by whole cell extraction and western blot analysis using a  $\alpha$ -GFP antibody. In wild type cells, a significant amount of free GFP was detected by western blot analysis under all tested amino acid starvation conditions, indicating that mitochondria were degraded. Consistent with published work, Om45-GFP degradation was blocked in  $\Delta atg7$ ,  $\Delta atg11$ , and  $\Delta atg32$  cells, demonstrating that mitochondrial degradation depends on both the general autophagy (Atg7) and mitophagy-specific machinery (Atg11 and Atg32) (Kanki and Klionsky, 2008; Kanki et al., 2009; Okamoto et al., 2009). Significantly, mitochondrial turnover was completely blocked in wild type cells in the presence of antimycin A or oligomycin under all carbon source conditions. (\*) indicates an unspecific  $\alpha$ -GFP signal. Quantification of the ratio of free GFP to total GFP (Om45-GFP and free GFP) relative to untreated wild type (wt=1) after starvation is shown as means and standard deviations of three (n=3) independent experiments.
